# Supplementary material for: Vitamin K as a high-performance organic anode material for rechargeable potassium ion batteries
Source: Royal Society of Chemistry journal article supplement (doi:10.1039/c8ta03921f), 2018-01-01
Supplement: c8ta03921f1.pdf [file c8ta03921f1.pdf]

## Supporting Information

### **Vitamin K as a high-performance organic anode material for rechargeable potassium ion batteries**

Qing Xue,<sup>a</sup> Dongning Li,<sup>a</sup> Yongxin Huang,<sup>a</sup> Xiaoxiao Zhang,<sup>a</sup> Yusheng Ye,<sup>a</sup>

Ersha Fan,<sup>a</sup> Li Li,<sup>a,b</sup> Feng Wu,<sup>a,b</sup> Renjie Chen,<sup>\* a,b</sup>

<sup>a</sup> Beijing Key Laboratory of Environmental Science and Engineering, Beijing Institute of Technology,  
Beijing 100081, China

<sup>b</sup> Collaborative Innovation Center of Electric Vehicles in Beijing, Beijing 100081, China

\*Corresponding author; Email: chenrj@bit.edu.cn

#### **Contents**

Fig.S1. SEM image of VK.

Fig.S2. (a) FT-IR and (b) Raman spectroscopy of GNT, VK and VK@GNT.

Fig.S3. CV curves of VK between 0.1 and 2.5 V at a scan rate of 1 mV s<sup>-1</sup>.

Fig.S4. Discharge capacities of GNT cycled between 0.2 and 2.5V at 100 mA h g<sup>-1</sup>.

Table S1. Area ratio of different kinds of C determined by XPS analysis from C1s spectrum at three states: as-prepared, discharged and charged.

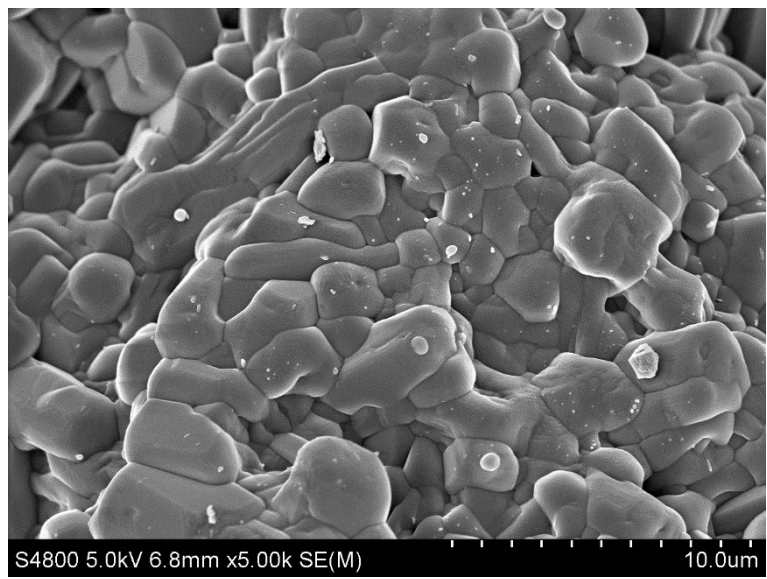

Fig.S1. SEM image of VK.

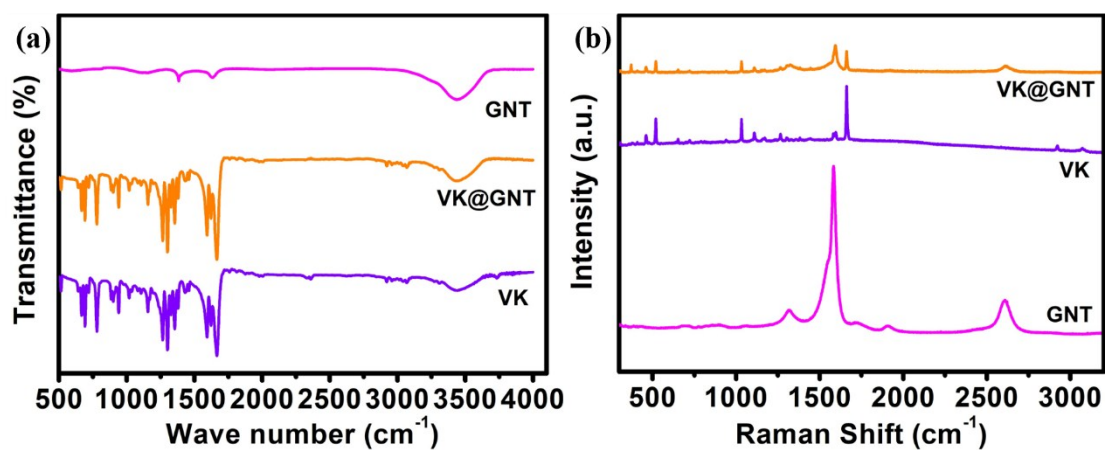

(a) FT-IR and (b) Raman spectroscopy of GNT, VK and VK@GNT.

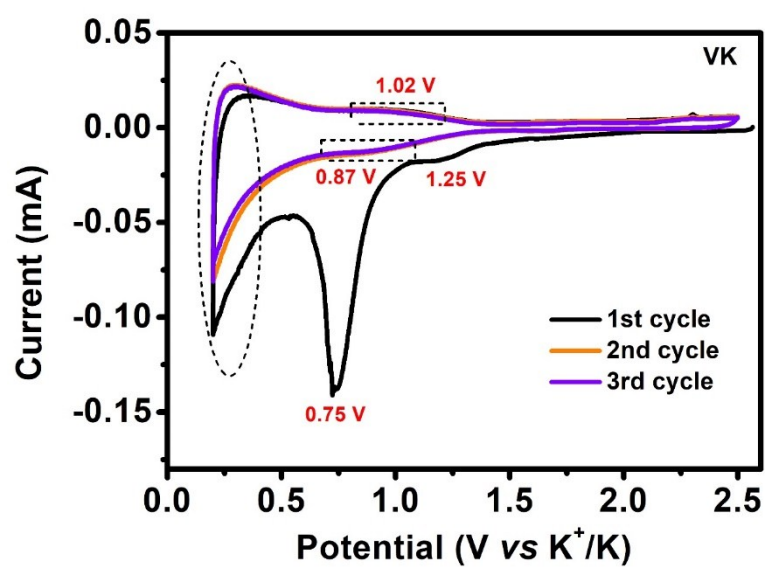

Fig.S3. CV curves of VK between 0.1 and 2.5 V at a scan rate of  $1 \text{ mV s}^{-1}$ .

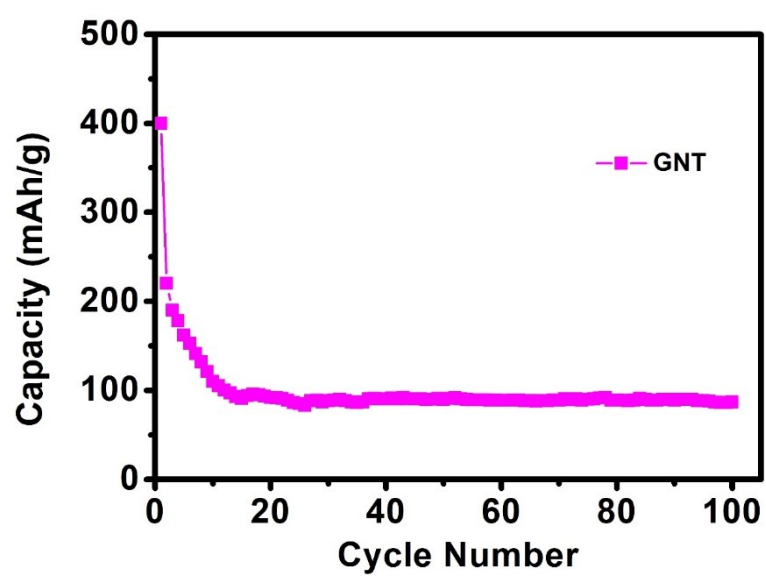

Fig.S4. Discharge capacities of GNT cycled between 0.2 and 2.5V at 100 mA h g<sup>-1</sup>.

Table S1. Area ratio of different kinds of C determined by XPS analysis from C1s spectrum at three states: as-prepared, discharged and charged.

|                    | C=O   | C-H/C-O-K | Others |
|--------------------|-------|-----------|--------|
| <b>As-prepared</b> | 1.1%  | 8.861%    | 90.04% |
| <b>Discharged</b>  | 0.04% | 10.94%    | 89.02% |
| <b>Recharged</b>   | 0.91% | 8.3%      | 90.79% |
